# Supplementary material
Source: PubMed Central journal article supplement (PMC3716117)
Supplement: AAC.02247-12_zac999101773so4.pdf [file AAC.02247-12_zac999101773so4.pdf]

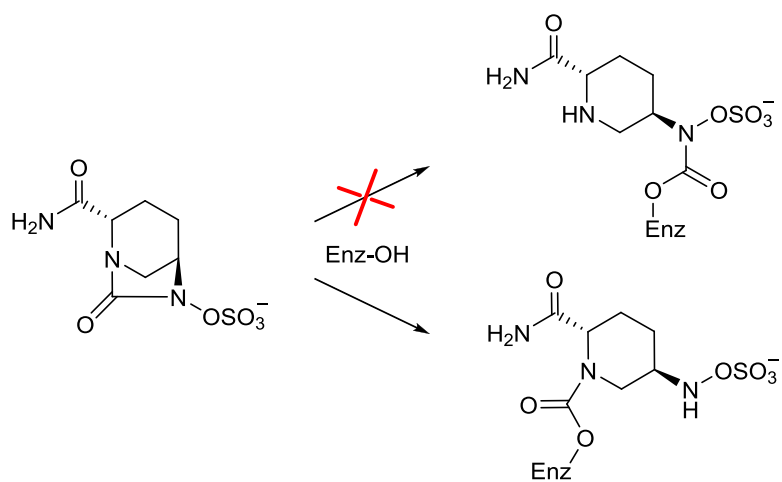

b

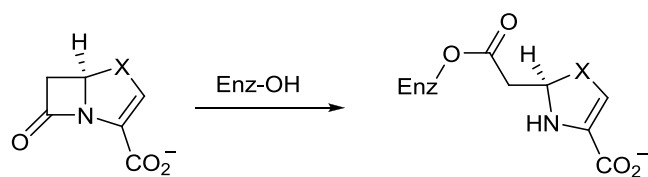

Figure S1: Bond cleavage upon covalent inhibition by: a) avibactam and b) carbapenem.

Figure S2:

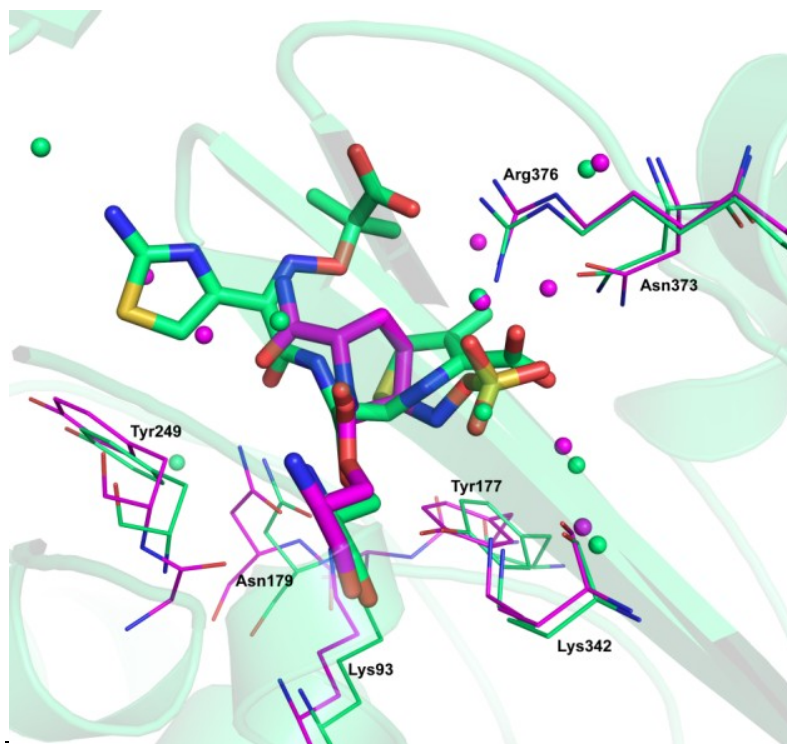

Overlay of avibactam on ceftazidime bound to AmpC. The carbon atoms of Avibactam are colored magenta, ceftazidime is colored green and the water molecules from each structure are shown in respective colors.

Figure S3:

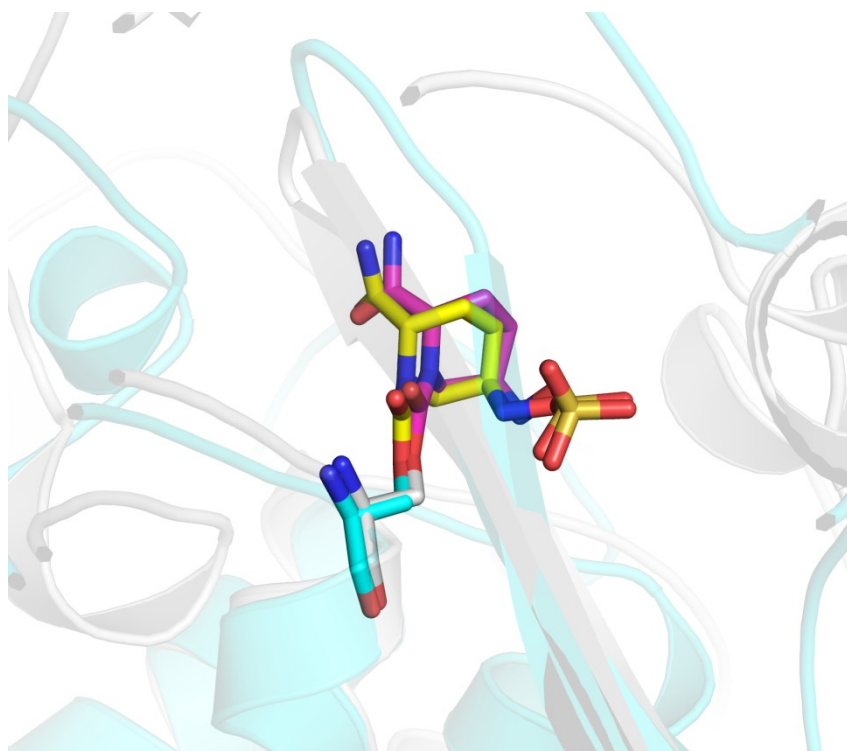

Comparison of the binding modes. Overlay of avibactam bound to CTX-M-15 and AmpC. The backbone chain for each protein is shown in cartoon diagram where CTX-M-15 is colored grey, while AmpC is colored cyan. The avibactam is depicted as sticks and the carbon atoms are colored magenta for CTX-M-15 and yellow for AmpC forms.

Figure S4:

*E. coli* and *P. aeruginosa* sequence alignment:

```

          10      20      30      40      50      60
ADV18979.1_Eco  1  FKTT--LCAL LITASCSTFA APQQIN---- ----DIVHR TITPLIEQQK IPGMAVAVIY
BAE06837.1_Pae  1  MRDTRFPCLC GIAASTLLFA TTPAIAGEAP ADRLKALVDA AVQPVMKAND IPGLAVAI SL

          70      80      90      100     110     120
ADV18979.1_Eco 50  QGKPYFTWG YADIARKQPV TQOTLFE LGS VSKTFTGVLG GDALARGEIK LSDPATKYWP
BAE06837.1_Pae 61  KGEPHYFSYG LASKEDGRRV TPETLFEIGS VSKTFTATLA GYALAQDKMR LDDRASQHPW

          130     140     150     160     170     180
ADV18979.1_Eco 110 ELTAKQWNGI TLLHLATYTA GGLPLQVPE VKSSDLLR- FYQNWQPAMA PGTQRLYANS
BAE06837.1_Pae 121 ALQGSRFDGI SLLDLATYTA GGLPLQFPDS VQRDQAQIRD YYRQWQPTYA PGSQRLYSNP

          190     200     210     220     230     240
ADV18979.1_Eco 169 SIGLFGALAV KPSGLSFEQA MQTRVFQPLK LNHTWINVPP PEEKNYAWGY -REGKAVHVS
BAE06837.1_Pae 181 SIGLFGYLA RSLGQPFERL MEQQVFPALG LEQTHLDVPE AALAQYQGY GKDDRPLRVG

          250     260     270     280     290     300
ADV18979.1_Eco 228 PGALDAEAYG VKSTIEDMAR WRSNMNPRD INDKTLQQGI QLAQSRYWQT GDMYQGLGWE
BAE06837.1_Pae 241 PGPLDAEGYG VKTSAADLLR FVDANLHPER L-DRPWAQAL DATHRGYYKV GDMTQGLGWE

          310     320     330     340     350     360
ADV18979.1_Eco 288 MLDWPVNPDS SIINGSGNKI ALAAHPVKAI TPPTPAVRAS WVKRTGATGG FGSYVAPIPE
BAE06837.1_Pae 300 AYDWPISLKR -LQAGNSTPM ALQPHRIARL PAPQALEGQR LLNKTGSTNG FGAYVAFVPG

          370     380     390
ADV18979.1_Eco 348 KELGIVMLAN KNYPNPARVA AAWQILNALQ -----
BAE06837.1_Pae 359 RDLGLVILAN RNYPNAERVK IAYAILSGLE QQKRVPLKR

```
